# Supplementary material for: Targeted Next-Generation Sequencing of Plasma DNA from Cancer Patients: Factors Influencing Consistency with Tumour DNA and Prospective Investigation of Its Utility for Diagnosis
Source: PubMed Central journal article supplement (PMC5023174; doi:10.1371/journal.pone.0162809), 2016-09-14

S2 Fig

A. Melanoma

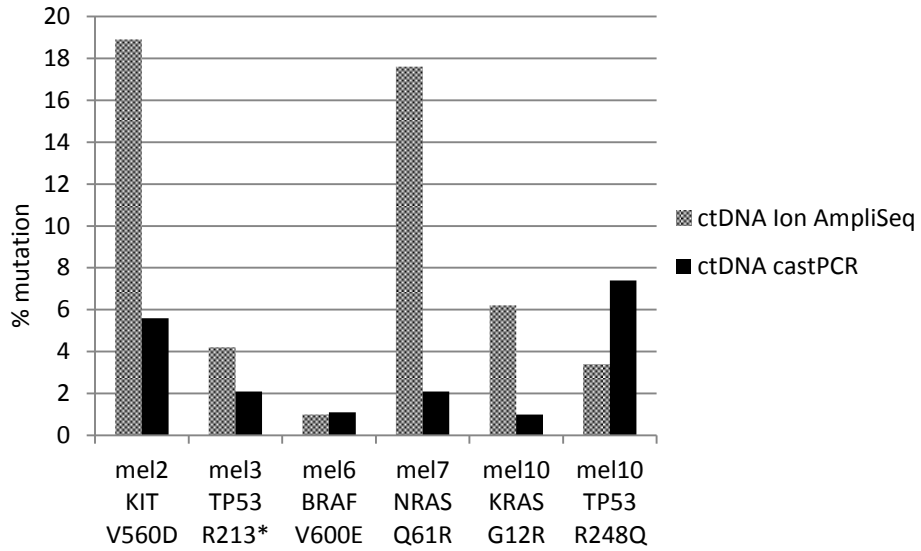

B. Lung

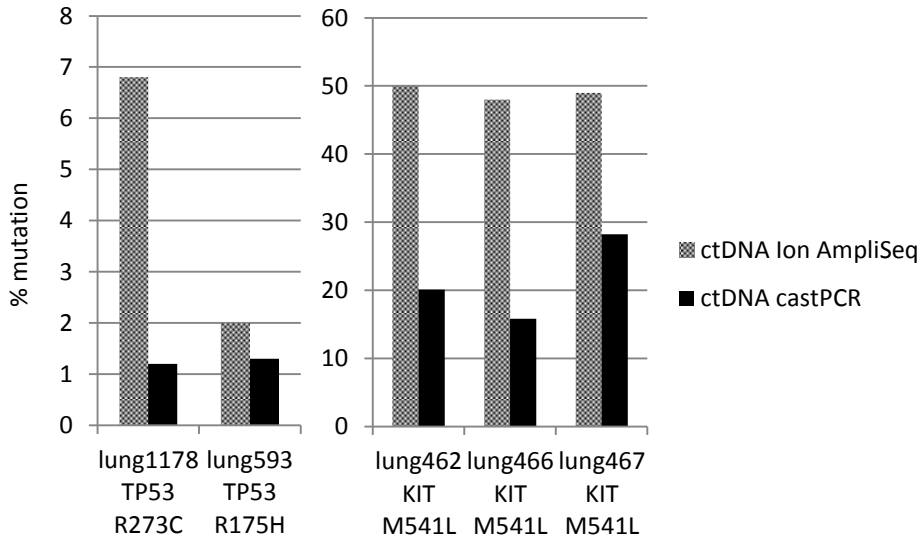

Supplement: pone.0162809.s002.pdf [file pone.0162809.s002.pdf]
